# Supplementary material for: Synthesis of mono-dispersed m-BiVO4 octahedral nano-crystals with enhanced visible light photocatalytic properties
Source: Royal Society of Chemistry journal article supplement (doi:10.1039/c1ce05539a), 2011-01-01
Supplement: c1ce05539a.pdf [file c1ce05539a.pdf]

## Supplementary Information

Synthesis of mono-dispersed *m*-BiVO<sub>4</sub> octahedral nano-crystals with enhanced visible light photocatalytic properties

### Authors and address:

Mandi Han<sup>1</sup>, Xiaofeng Chen<sup>1</sup>, Ting Sun<sup>2</sup>, Ooi Kiang Tan<sup>1\*</sup> and Man Siu Tse<sup>1</sup>

<sup>1</sup>School of Electrical and Electronic Engineering, Nanyang Technological University, Singapore 639798

<sup>2</sup>School of Materials Science and Engineering, Nanyang Technological University, Singapore 639798

### Contents

Fig. 1 SEM images of the as-prepared *m*-BiVO<sub>4</sub> synthesized with SDBS at different acid concentration (fixed reaction time 24 h): (a) 1.5 M, (b) 1.2 M, (c) 1 M, (d) 0.8 M and (e) pH = 2.

Fig. 2 The repeated photocatalytic degradation of RB for the recollected octahedral-shape photocatalysts after the first test.

---

\* Electronic mail: [eoktan@ntu.edu.sg](mailto:eoktan@ntu.edu.sg) (Ooi Kiang Tan)

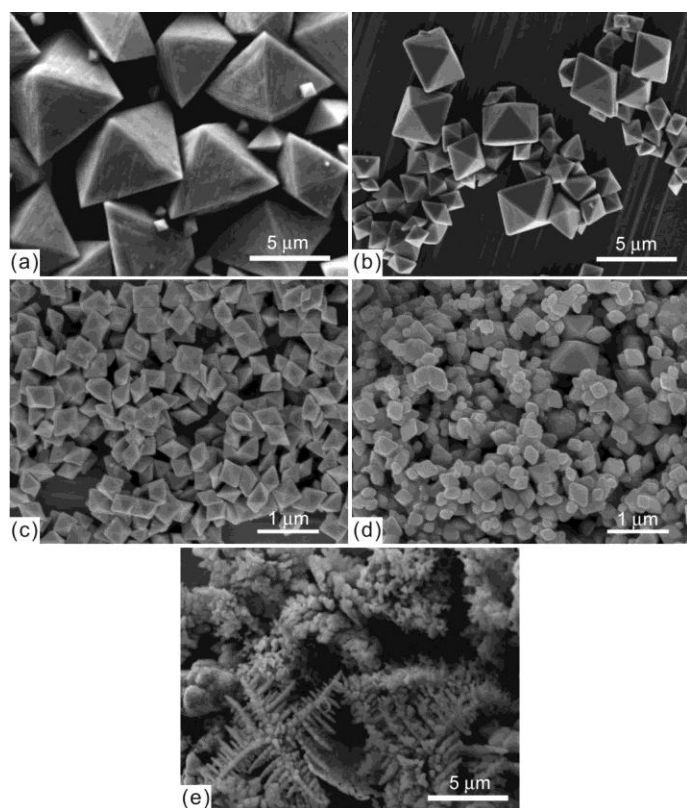

SI Fig. 1 SEM images of the as-prepared  $m$ -BiVO<sub>4</sub> synthesized with SDBS at different acid concentration (fixed reaction time 24 h): (a) 1.5 M, (b) 1.2 M, (c) 1 M, (d) 0.8 M and (e) pH = 2.

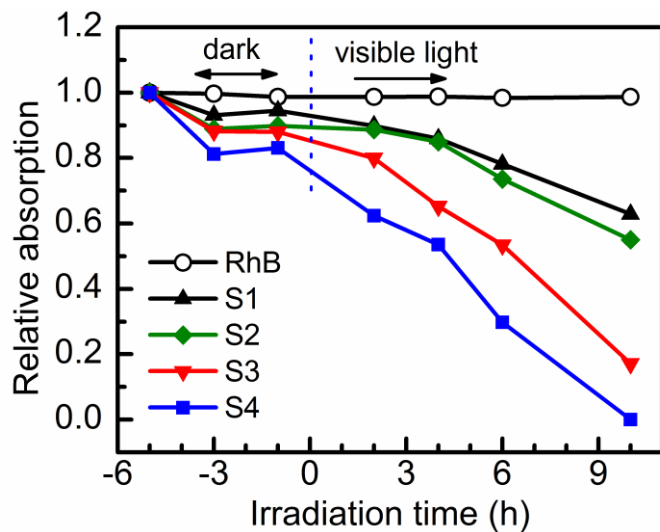

SI Fig. 2 (color online) The repeated photocatalytic degradation of RhB for the recollected octahedral-shape photocatalysts after the first test.
